# Supplementary material for: LONGIFOLIA1andLONGIFOLIA2, two homologous genes,regulate longitudinal cell elongation inArabidopsis
Source: Oxford University Press journal article supplement (doi:10.1242/dev.02604), 2006-10-12
Supplement: dev02604-tables2.pdf [file dev02604-tables2.pdf]

**Table S2. Measurement of the cell size in the petiole of the fifth leaf of wild type, and *lng1-1D*, *lng1-3 lng2-1*, *rot3-1*, *lng1-3 lng2-1 rot3-1* and *lng1-1D rot3-1* mutants**

|                                                                           | Col-0                     | <i>lng1-1D</i>             | <i>lng1-3 lng2-1</i>       | <i>rot3-1</i>              | <i>lng1-3 lng2-1 rot3-1</i> | <i>lng1-1D rot3-1</i>      |
|---------------------------------------------------------------------------|---------------------------|----------------------------|----------------------------|----------------------------|-----------------------------|----------------------------|
| Epidermal cell size (μm) in petiole measured in the leaf length direction | 392.8±34.9 ( <i>n</i> =5) | 463.3±38.5* ( <i>n</i> =4) | 295.0±51.4* ( <i>n</i> =4) | 205.5±70.9* ( <i>n</i> =5) | 140.0±19.3* ( <i>n</i> =5)  | 215.9±20.8* ( <i>n</i> =5) |
| Palisade cell size (μm) in petiole measured in the leaf length direction  | 141.1±19.3 ( <i>n</i> =5) | 179.0±21.5* ( <i>n</i> =4) | 110.4±16.0* ( <i>n</i> =4) | 111.7±15.9* ( <i>n</i> =4) | 83.3±11.4* ( <i>n</i> =4)   | 128.3±13.5 ( <i>n</i> =5)  |

Fully expanded leaves from 39-day-old old plants were subjected to paradermal image. For cell size measurements, more than 100 cells were assayed in the leaf petioles. Results are given ±s.d. *n*, number of plant leaves measured.

\*Compared with the wild type, level of significance was 5% (paired Student's *t*-test).
