# Supplementary material for: LONGIFOLIA1andLONGIFOLIA2, two homologous genes,regulate longitudinal cell elongation inArabidopsis
Source: Oxford University Press journal article supplement (doi:10.1242/dev.02604), 2006-10-12
Supplement: dev02604-tables4.pdf [file dev02604-tables4.pdf]

**Table S4. Measurements of silique length in the wild type, and in *lng1-3 lng2-1*, *lng1-3lng2-1 rot3-1* and *lng1-1D rot3-1* mutants**

|                     | Col-0                    | <i>lng1-1D</i>            | <i>lng1-3lng2-1</i>      | <i>rot3-1</i>            | <i>lng1-3lng2-1rot3-1</i> | <i>lng1-1D rot3-1</i>    |
|---------------------|--------------------------|---------------------------|--------------------------|--------------------------|---------------------------|--------------------------|
| Silique length (mm) | 11.5±1.1 ( <i>n</i> =15) | 15.9±1.3 ( <i>n</i> =15)* | 7.7±0.8 ( <i>n</i> =15)* | 8.6±1.2 ( <i>n</i> =20)* | 6.4±0.7 ( <i>n</i> =15)*  | 13.0±10.( <i>n</i> =15)* |

Silique measurements were taken 60 days after seeds were sown. Results are given ±s.d. *n*, number of plants examined.

\*Compared with the wild type, level of significance was 5% (paired Student's *t*-test).
